# Supplementary material
Source: Springer Nature journal article supplement (https://www.springermedizin.de/resource/supplementary/12889_2014_7114_MOESM3_ESM.pdf/9499886)
Supplement: MOESM3 [file 9499886]

**Table 1 Background characteristics and mean SAHL scores (n=329)**

|                                                               | n (%)    | SAHL recognition (SD) | SAHL comprehension (SD) | SAHL total (SD)   |
|---------------------------------------------------------------|----------|-----------------------|-------------------------|-------------------|
| <b>Gender</b>                                                 |          |                       |                         |                   |
| Men                                                           | 136 (41) | 29.0 (3.7)            | <b>25.2 (4.8)</b>       | <b>54.2 (7.7)</b> |
| Women                                                         | 193 (59) | 29.4 (3.0)            | <b>27.2 (3.7)</b>       | <b>56.7 (5.9)</b> |
| <b>Age</b><br>mean age: 56.2 (14.9)                           | -        |                       |                         |                   |
| <44                                                           | 86 (26)  | <b>29.8 (3.0)</b>     | <b>26.4 (4.6)</b>       | <b>56.2 (6.9)</b> |
| 45-65                                                         | 131 (40) | <b>29.6 (3.2)</b>     | <b>27.1 (4.1)</b>       | <b>57.7 (6.5)</b> |
| >65                                                           | 112 (34) | <b>28.3 (3.5)</b>     | <b>25.5 (4.1)</b>       | <b>53.8 (6.8)</b> |
| <b>Education*</b>                                             |          |                       |                         |                   |
| Low                                                           | 92 (28)  | <b>27.5 (3.7)</b>     | <b>24.6 (4.4)</b>       | <b>52.1 (7.0)</b> |
| Intermediate                                                  | 123 (38) | <b>29.0 (3.3)</b>     | <b>25.9 (4.3)</b>       | <b>54.9 (6.9)</b> |
| High                                                          | 110 (34) | <b>31.0 (1.8)</b>     | <b>28.4 (3.2)</b>       | <b>59.3 (4.2)</b> |
| <b>Ethnic origin</b>                                          |          |                       |                         |                   |
| Dutch                                                         | 313 (95) | 29.3 (3.2)            | 26.3 (4.3)              | 55.6 (6.8)        |
| Other                                                         | 16 (5)   | 28.5 (4.2)            | 27.3 (3.9)              | 55.8 (7.5)        |
| <b>Mother tongue</b>                                          |          |                       |                         |                   |
| Dutch                                                         | 319 (97) | 29.3 (3.2)            | 26.4 (4.3)              | 55.6 (6.8)        |
| Other                                                         | 10 (3)   | 28.8 (4.0)            | 25.8 (4.1)              | 54.6 (7.2)        |
| <b>Contact with professional care provider in past year**</b> |          |                       |                         |                   |
| 0 times                                                       | 28 (9)   | 29.2 (3.6)            | 26.8 (3.7)              | 55.9 (6.7)        |
| 1 – 5 times                                                   | 196 (60) | 29.2 (3.2)            | 26.1 (4.3)              | 55.3 (6.6)        |
| 5 – 10 times                                                  | 55 (17)  | 29.4 (3.6)            | 26.8 (4.5)              | 56.2 (7.5)        |
| > 10 times                                                    | 47 (14)  | 29.3 (3.0)            | 27.1 (4.3)              | 56.5 (6.8)        |
| <b>Working in health care ***</b>                             |          |                       |                         |                   |
| Never worked in health care                                   | 213 (65) | <b>28.9 (3.4)</b>     | <b>25.5 (4.2)</b>       | <b>54.4 (6.7)</b> |
| Used to work in health care                                   | 56 (17)  | <b>29.1 (3.6)</b>     | <b>27.4 (4.6)</b>       | <b>56.6 (7.7)</b> |
| Now works in health care                                      | 54 (16)  | <b>30.6 (2.1)</b>     | <b>28.9 (2.9)</b>       | <b>59.5 (4.4)</b> |

\* 4 missing

\*\* 3 missing

\*\*\* 6 missing

[Significant differences (p&lt;0.05) are presented in bold]
